# Supplementary material for: Facile sonochemical synthesis of water-soluble gold nanodots as fluorescent probes for superoxide radical anion detection and cell imaging
Source: Royal Society of Chemistry journal article supplement (doi:10.1039/c6ay03294j), 2017-01-01
Supplement: c6ay03294j1.pdf [file c6ay03294j1.pdf]

**Facile sonochemical synthesis of water-soluble gold nanodots as  
fluorescence probe for superoxide radical anion detection and cell  
imaging**

Zhiying Li \*, Li Xiao

*Department of Chemistry, Xinzhou Normal University, Xinzhou 034000, PR China.*

**\*Corresponding author**

**E-mail address:** lizhiying8001@163.com

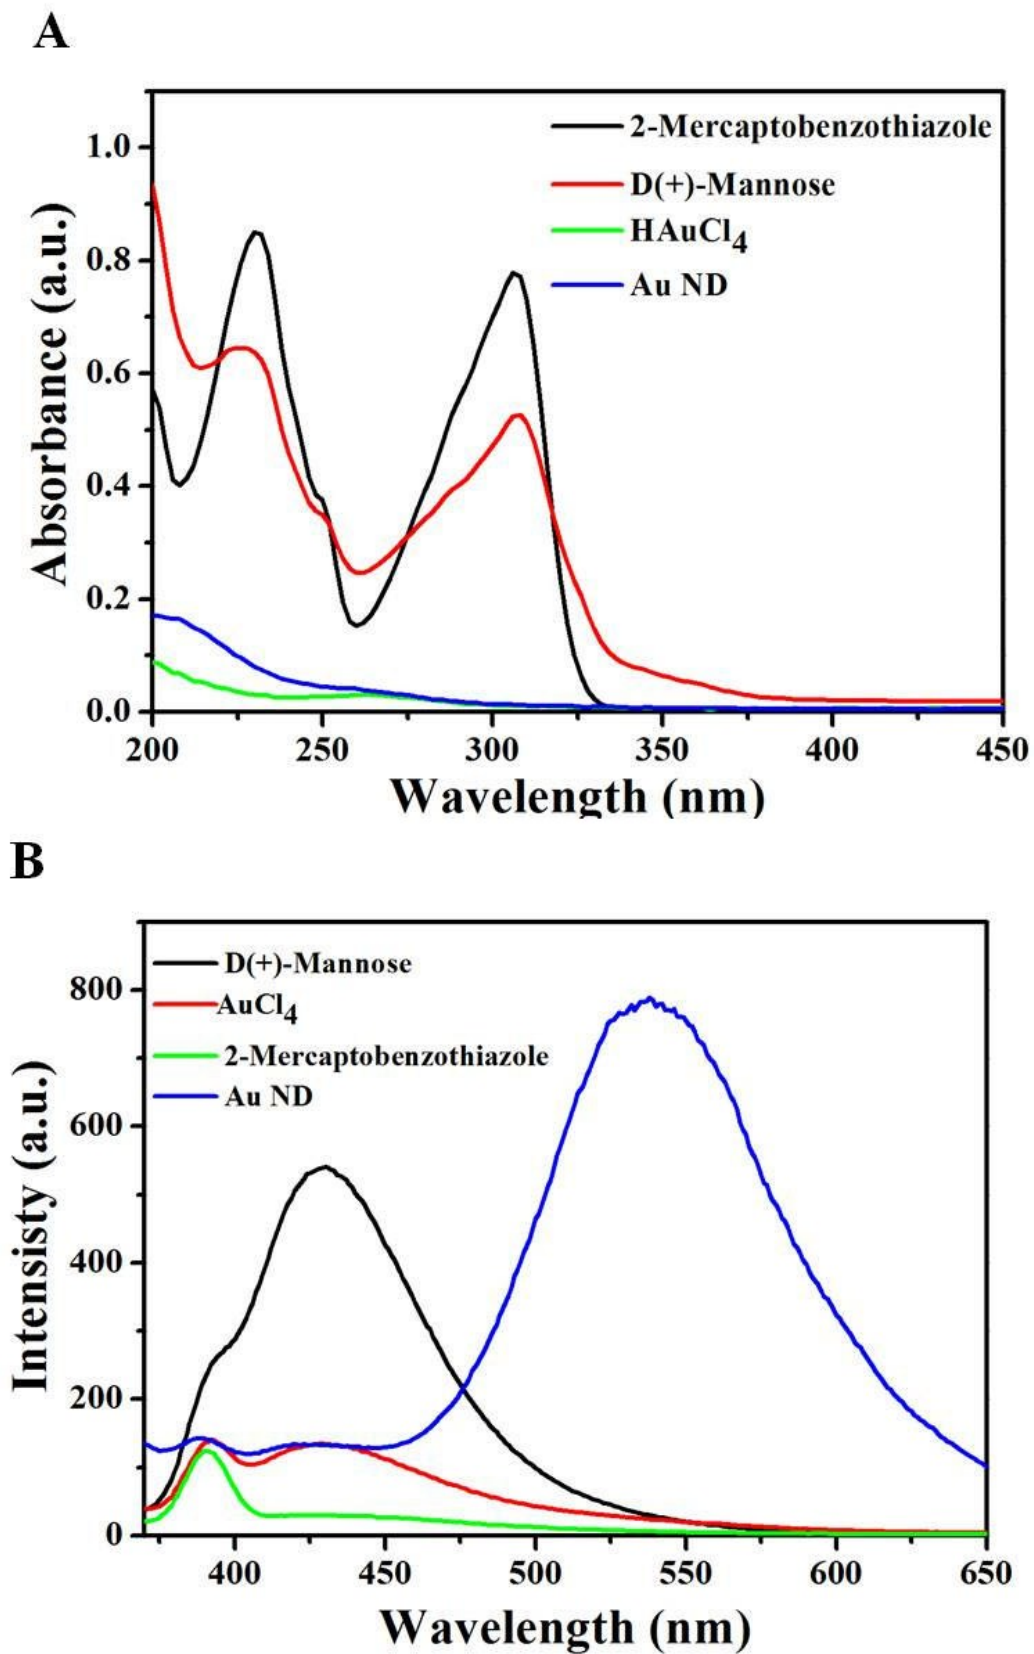

**Fig. S1.** The UV-vis absorption spectra (A) and fluorescence spectra (B) of HAuCl<sub>4</sub>, 2-Mercaptobenzothiazole, D (+) -Mannose, and Au NDs.

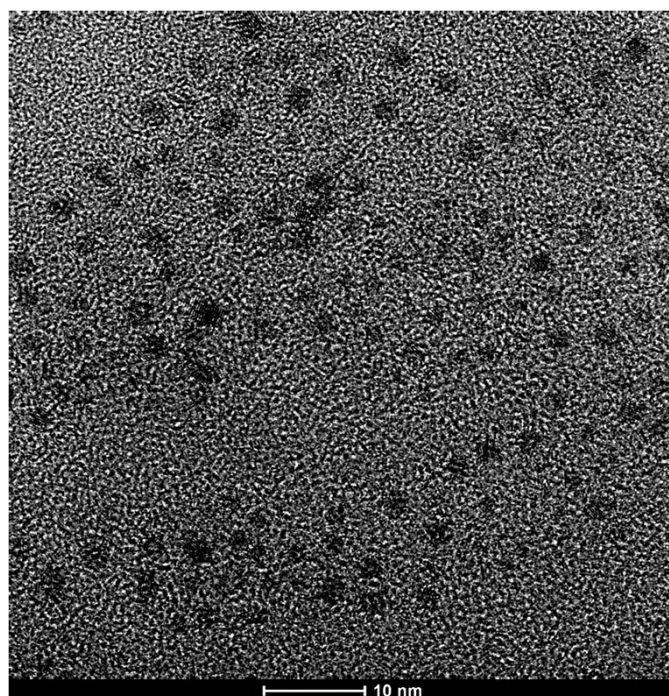

**Fig. S2.** The TEM image of Au NDs, scale bar: 10 nm.

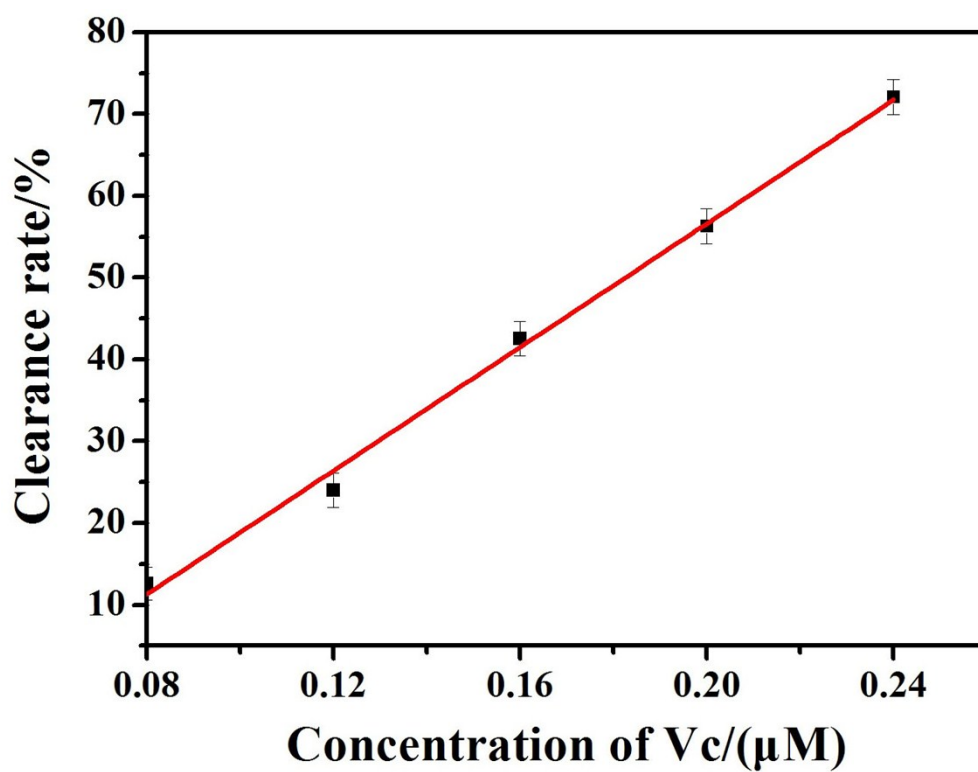

**Fig. S3.** The standard curve line of scavenging effect of ascorbic acid on superoxide radical anion with the concentration of ascorbic acid.
